# Supplementary material for: Evaluation of AgHAP-containing polyurethane foam dressing for wound healing: synthesis, characterization, in vitro and in vivo studies
Source: Royal Society of Chemistry journal article supplement (doi:10.1039/c5tb00995b), 2015-01-01
Supplement: c5tb00995b1.pdf [file c5tb00995b1.pdf]

(Electronic Supplementary Information for *Journal of Materials Chemistry B*)

**Evaluation of AgHAP-containing polyurethane foam dressing for  
wound healing: Synthesis, characterization, in vitro and in vivo studies**

Do Gi Pyun,<sup>a</sup> Hyoung Soon Yoon,<sup>b</sup> Ho Yun Chung,<sup>b</sup> Hyun Jun Choi,<sup>a</sup> Thavasyappan

Thambi,<sup>c</sup> Bong Sup Kim,<sup>c</sup> and Doo Sung Lee<sup>c,\*</sup>

<sup>a</sup>Department of Polymer Science and Engineering, Sungkyunkwan University, Suwon  
440-746, Republic of Korea

<sup>b</sup>Biomedical Polymer R&D institute, T&L, Co., Ltd., Anseong 456-812, Republic of  
Korea

<sup>c</sup>School of Chemical Engineering, College of Engineering, Sungkyunkwan University,  
Suwon 440-746, Republic of Korea

\*Corresponding author:

Doo Sung Lee, Ph.D.

Tel.: +82-31-290-7282; Fax: 82-31-292-8790; e-mail: [dslee@skku.edu](mailto:dslee@skku.edu)

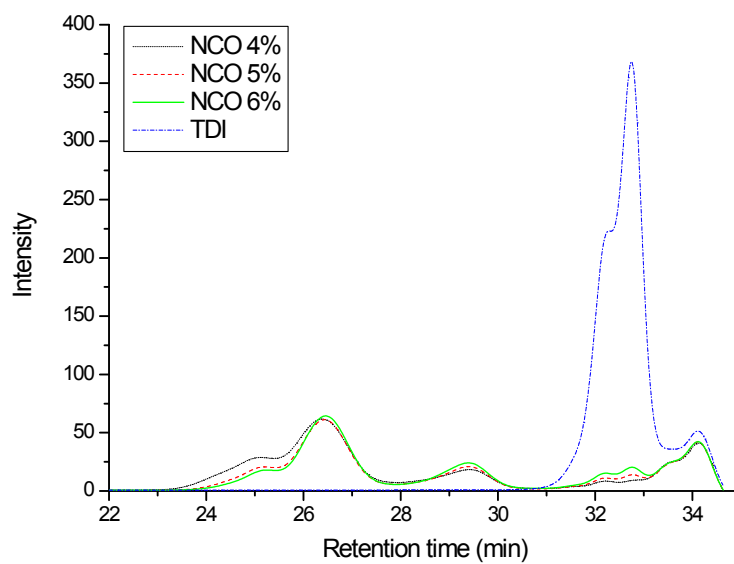

**Fig. S1.** The GPC chromatogram of MeOH end-capped PU copolymer prepared at different NCO/OH ratio.

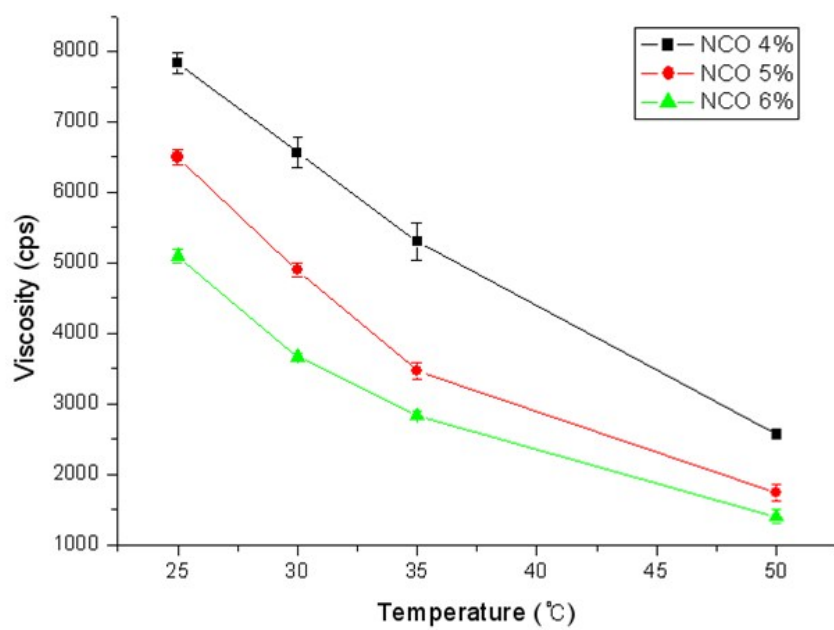

**Fig. S2.** Brookfield viscosity on free isocyanate content (NCO %) of PU copolymer.

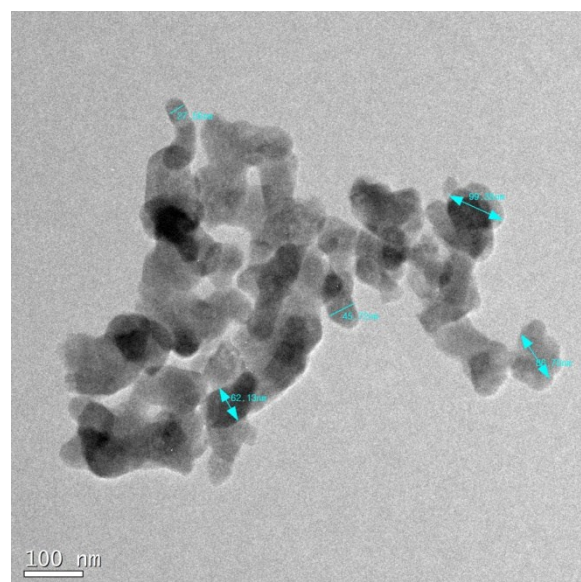

**Fig. S3.** TEM image of AgHAP.

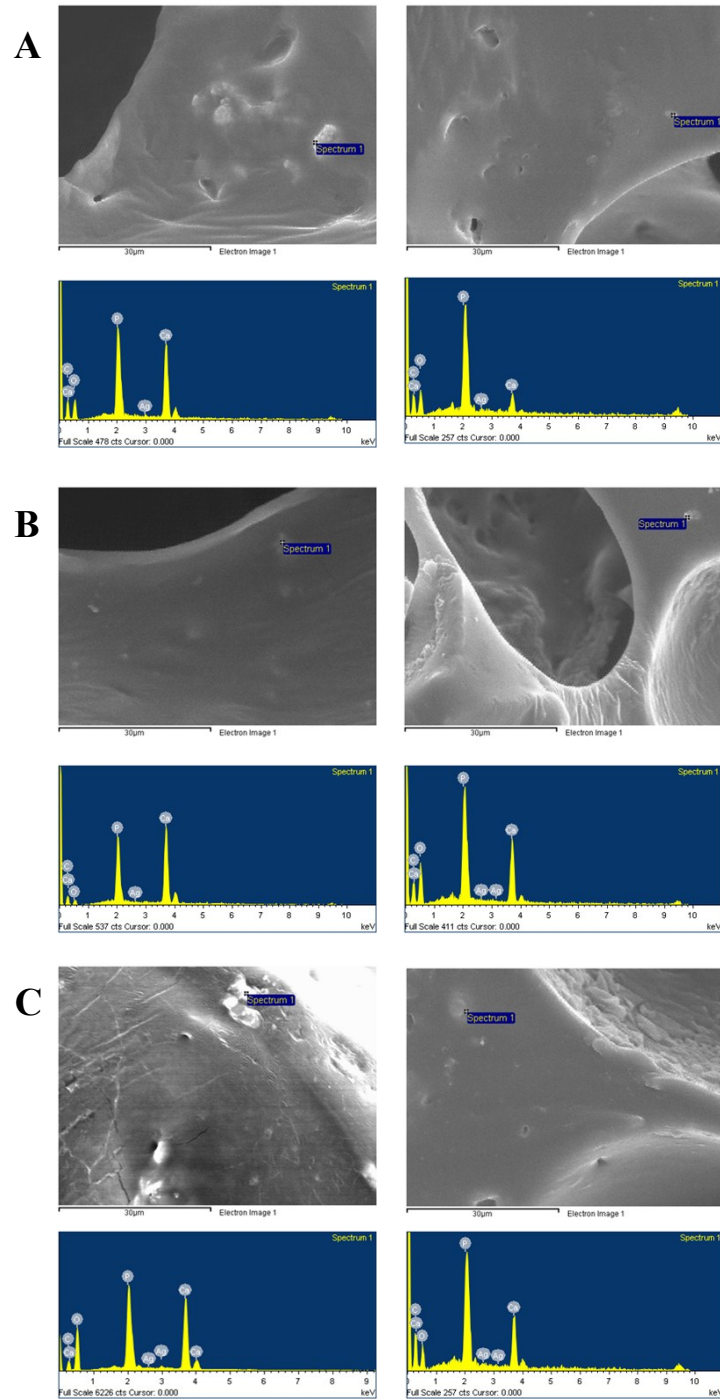

**Fig. S4.** SEM images and EDS analysis of AgHAP/PUFs before and after release experiments in deionized water; (A) AgHAP(2.5)/PUF, (B) AgHAP(5.0)/PUF, (C) AgHAP(7.5)/PUF (magnification 2,000 x).

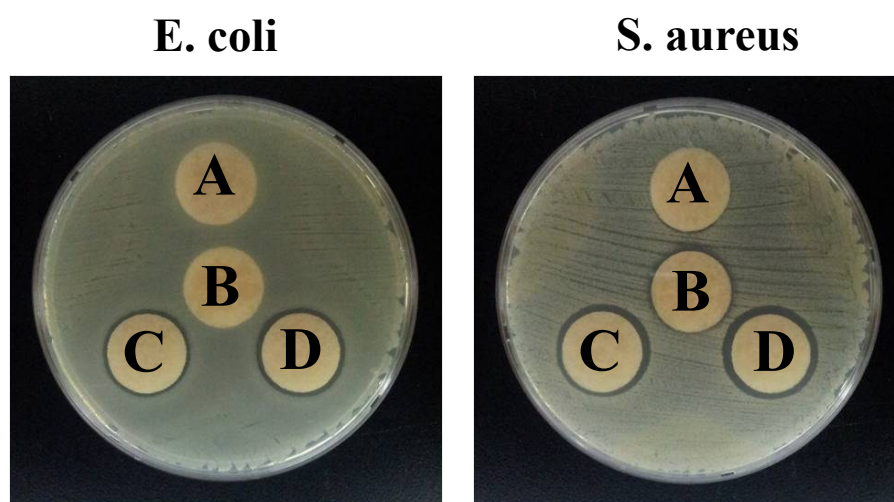

**Fig. S5.** Inhibitory effect of AgHAP/PUFs against *Escherichia coli* and *Staphylococcus aureus*; (A) AgHAP(0)/PUF, (B) AgHAP(2.5)/PUF, (C) AgHAP(5.0)/PUF, (D) AgHAP(7.5)/PUF.

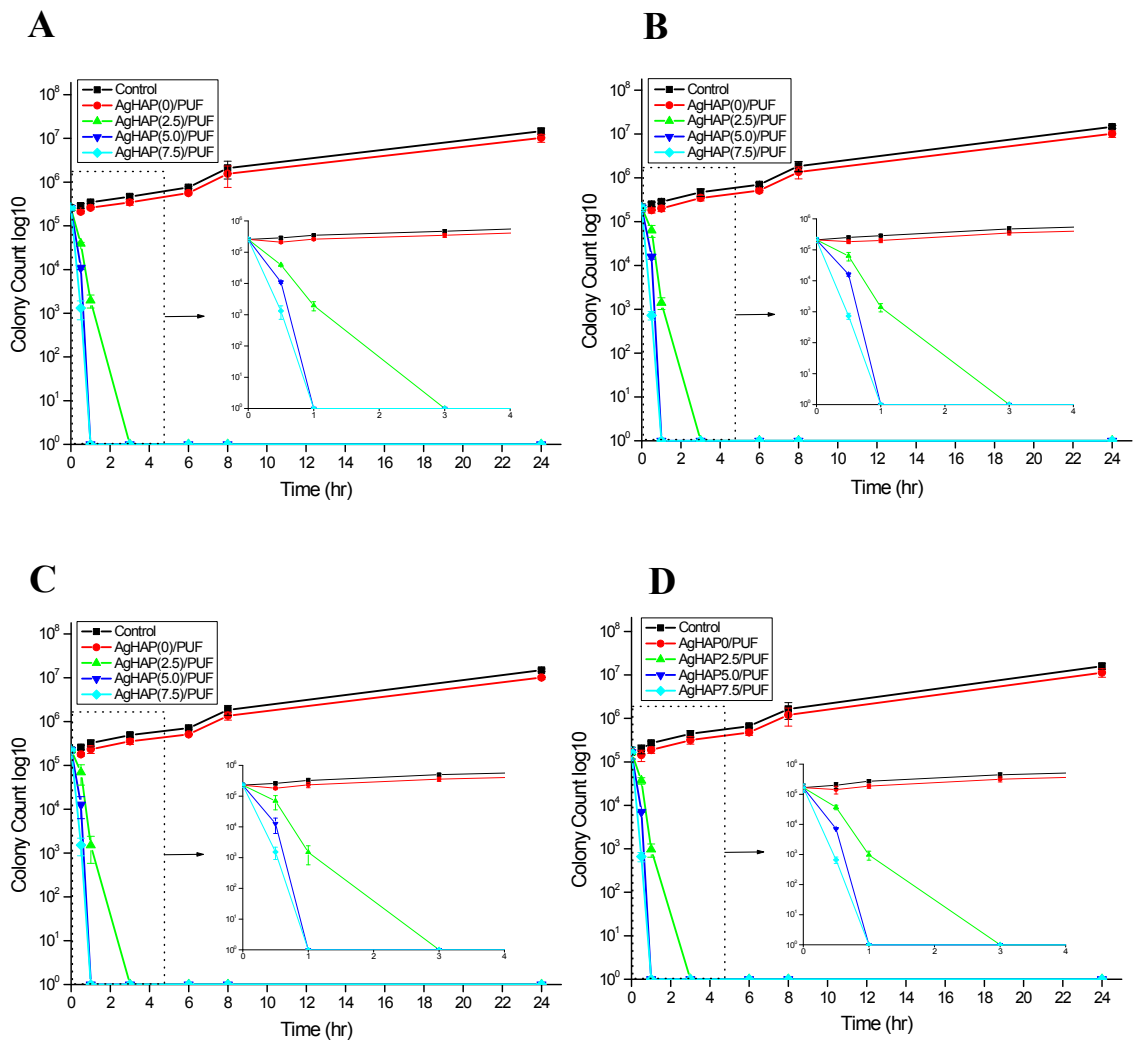

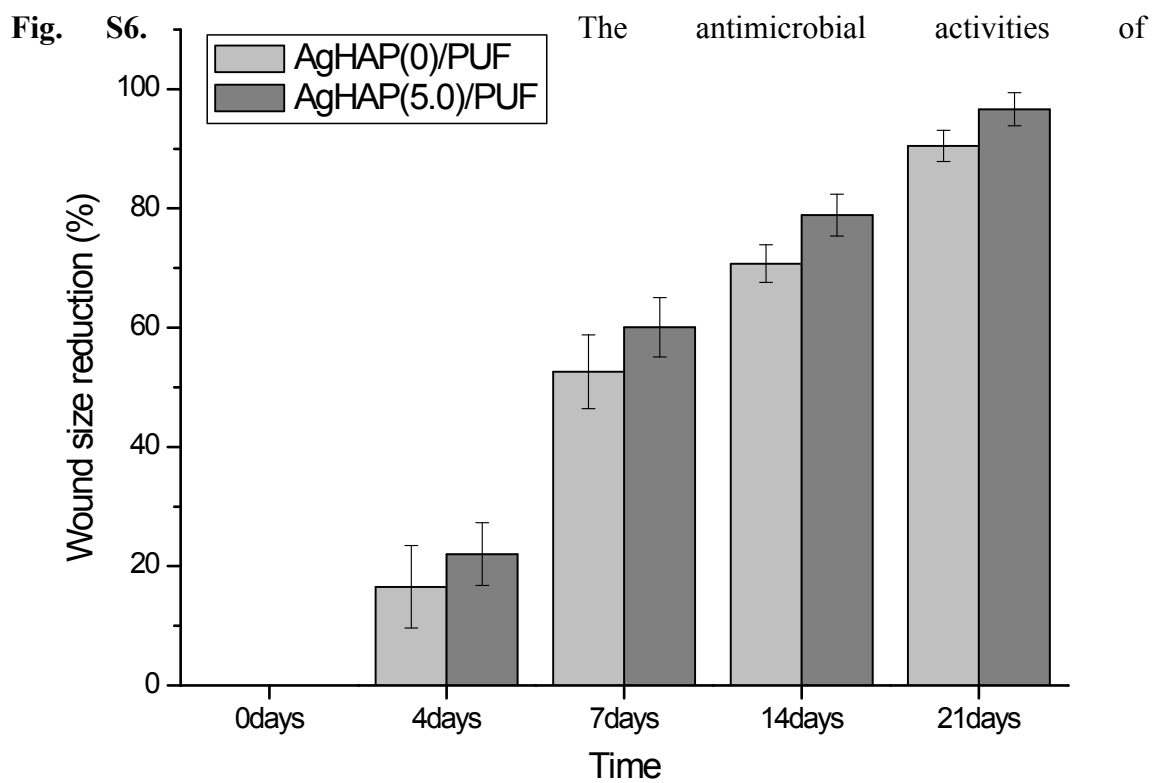

AgHAP/PUFs against four micro-organisms during a 24 h period; (A) MRSA (ATCC 33591), (B) *E. coli* (ATCC 35218), (C) *P. aeruginosa* (ATCC 27853), (D) *S. aureus* (ATCC 25923).



**Fig. S7.** Wound size reduction (%) in infected wound treated with AgHAP(0)/PUF and AgHAP(5.0)/PUF (n = 5).

**Table S1.** Average molecular weights and polydispersity index (PDI) of PU prepolymers with different NCO/OH ratio.

| NCO % | Retention time (min) | Mn | Mw | MP | Polydispersity |
|-------|----------------------|----|----|----|----------------|
|-------|----------------------|----|----|----|----------------|

|   |        |       |        |       |          |
|---|--------|-------|--------|-------|----------|
| 4 | 25.952 | 8,822 | 10,698 | 7,344 | 1.212681 |
| 5 | 25.940 | 8,327 | 9,797  | 7,382 | 1.176435 |
| 6 | 25.911 | 8,003 | 9,144  | 7,477 | 1.142612 |

**Table S2.** Inhibition zone length (mm). The size of each foam sample was 15mm diameter.

| Micro-organisms | Inhibition zone length diameter (mm) |                       |                       |                       |
|-----------------|--------------------------------------|-----------------------|-----------------------|-----------------------|
|                 | (A)AgHAP(0)<br>/PUF                  | (B)AgHAP(2.5)<br>/PUF | (C)AgHAP(5.0)<br>/PUF | (D)AgHAP(7.5)<br>/PUF |
| E. coli         | 0                                    | 0                     | 0.75                  | 1.5                   |
| S. aureus       | 0                                    | 0.5                   | 2.0                   | 2.3                   |

**Table S3.** Antimicrobial activity of AgHAP/PUFs ; The colony-forming unit (CFU) of MRSA, E. coli, P. aeruginosa and S. aureus after treatment with AgHAP/PUFs after (A) 1 h and (B) 3 h.

(A) after 1 h

|                               |                | <i>MRSA (ATCC 33591)</i>              |                           | <i>E. coli (ATCC 35218)</i>           |                           |
|-------------------------------|----------------|---------------------------------------|---------------------------|---------------------------------------|---------------------------|
| Ma(untreated, 0 contact time) |                | 2.2 x 10 <sup>5</sup> CFU             | Reduction of bacteria (%) | 2.1 x 10 <sup>5</sup> CFU             | Reduction of bacteria (%) |
| Sample code                   |                | Number of surviving bacteria (CFU/ml) |                           | Number of surviving bacteria (CFU/ml) |                           |
| Mc                            | Control        | 3.3 x 10 <sup>5</sup>                 | 0                         | 2.9 x 10 <sup>5</sup>                 | 0                         |
|                               | AgHAP(0)/PUF   | 2.4 x 10 <sup>5</sup>                 | 27.3                      | 2.0 x 10 <sup>5</sup>                 | 31.0                      |
|                               | AgHAP(2.5)/PUF | 1.7 x 10 <sup>3</sup>                 | 99.5                      | 1.7 x 10 <sup>3</sup>                 | 99.4                      |
|                               | AgHAP(5.0)/PUF | < 10                                  | 99.9                      | < 10                                  | 99.9                      |
|                               | AgHAP(7.5)/PUF | < 10                                  | 99.9                      | < 10                                  | 99.9                      |

|                               |                | <i>P. aeruginosa (ATCC 27853)</i>     |                           | <i>S. aureus (ATCC 25923)</i>         |                           |
|-------------------------------|----------------|---------------------------------------|---------------------------|---------------------------------------|---------------------------|
| Ma(untreated, 0 contact time) |                | 2.3 x 10 <sup>5</sup> CFU             | Reduction of bacteria (%) | 2.2 x 10 <sup>5</sup> CFU             | Reduction of bacteria (%) |
| Sample code                   |                | Number of surviving bacteria (CFU/ml) |                           | Number of surviving bacteria (CFU/ml) |                           |
| Mc                            | Control        | 2.6 x 10 <sup>5</sup>                 | 0                         | 3.0 x 10 <sup>5</sup>                 | 0                         |
|                               | AgHAP(0)/PUF   | 1.8 x 10 <sup>5</sup>                 | 30.8                      | 2.2 x 10 <sup>5</sup>                 | 26.6                      |
|                               | AgHAP(2.5)/PUF | 1.3 x 10 <sup>3</sup>                 | 99.5                      | 6.0 x 10 <sup>3</sup>                 | 98.0                      |
|                               | AgHAP(5.0)/PUF | < 10                                  | 99.9                      | < 10                                  | 99.9                      |
|                               | AgHAP(7.5)/PUF | < 10                                  | 99.9                      | < 10                                  | 99.9                      |

(B) after 3 h

|  |  | <i>MRSA (ATCC 33591)</i> | <i>E. coli (ATCC 35218)</i> |
|--|--|--------------------------|-----------------------------|
|--|--|--------------------------|-----------------------------|

| Ma(untreated, 0 contact time) |                | 2.2 x 10 <sup>5</sup> CFU             | Reduction of bacteria (%) | 2.1 x 10 <sup>5</sup> CFU             | Reduction of bacteria (%) |
|-------------------------------|----------------|---------------------------------------|---------------------------|---------------------------------------|---------------------------|
| Sample code                   |                | Number of surviving bacteria (CFU/ml) |                           | Number of surviving bacteria (CFU/ml) |                           |
| Mc                            | Control        | 4.2 x 10 <sup>5</sup>                 | 0                         | 5.6 x 10 <sup>5</sup>                 | 0                         |
|                               | AgHAP(0)/PUF   | 3.0 x 10 <sup>5</sup>                 | 28.6                      | 4.0 x 10 <sup>5</sup>                 | 28.6                      |
|                               | AgHAP(2.5)/PUF | < 10                                  | 99.9                      | < 10                                  | 99.9                      |
|                               | AgHAP(5.0)/PUF | < 10                                  | 99.9                      | < 10                                  | 99.9                      |
|                               | AgHAP(7.5)/PUF | < 10                                  | 99.9                      | < 10                                  | 99.9                      |

|                               |                | <i>P. aeruginosa</i> (ATCC 27853)     | <i>S. aureus</i> (ATCC 25923) |                                       |                           |
|-------------------------------|----------------|---------------------------------------|-------------------------------|---------------------------------------|---------------------------|
| Ma(untreated, 0 contact time) |                | 2.3 x 10 <sup>5</sup> CFU             | Reduction of bacteria (%)     | 2.2 x 10 <sup>5</sup> CFU             | Reduction of bacteria (%) |
| Sample code                   |                | Number of surviving bacteria (CFU/ml) |                               | Number of surviving bacteria (CFU/ml) |                           |
| Mc                            | Control        | 5.6 x 10 <sup>5</sup>                 | 0                             | 5.1 x 10 <sup>5</sup>                 | 0                         |
|                               | AgHAP(0)/PUF   | 4.2 x 10 <sup>5</sup>                 | 25.0                          | 3.8 x 10 <sup>5</sup>                 | 25.5                      |
|                               | AgHAP(2.5)/PUF | < 10                                  | 99.9                          | < 10                                  | 99.9                      |
|                               | AgHAP(5.0)/PUF | < 10                                  | 99.9                          | < 10                                  | 99.9                      |
|                               | AgHAP(7.5)/PUF | < 10                                  | 99.9                          | < 10                                  | 99.9                      |
